# Supplementary material for: Altitude adaptation in Tibetans caused by introgression of Denisovan-like DNA
Source: Springer Nature journal article supplement (doi:10.1038/nature13408), 2014-07-01
Supplement: 41586_2014_BFnature13408_MOESM27_ESM.pdf [file 41586_2014_BFnature13408_MOESM27_ESM.pdf]

## **Estimate of effective population size**

We obtained an estimate of the Tibetan population's effective size by fitting a demographic model of constant population size to the synonymous site frequency spectrum of the exome data from Yi *et al.* 2010 (S1). We used the software *dadi* (S2) to fit the model to the data, and we estimated an effective population size of  $N=7000$ .

## **Estimate of the mutation rate**

We estimated the mutation rate in the *EPAS1* region by using an Approximate Bayesian Computation (ABC) framework following Peter *et al.* 2012 (S3). Using the same set of summary statistics, we obtained posterior estimates for the mutation rate under three different models: a neutral model, a model of selection on a de novo mutation, and a model of selection on standing variation. The summary statistics used are both based on haplotype patterns and based on the site frequency spectrum. In particular we used iHS (S4), EHH (S5), and EHH in a 10 kb, 20 kb and 50 kb window, centered on the putative selected site. For the frequency based statistics, we used Tajima's D (S6), Fay & Wu's H (S7), the average number of pairwise differences  $\pi$ , and the number of segregating sites  $S$  as statistics. All these statistics are calculated for three regions: a central region of 20 kb around the selected site, an intermediate region consisting of all sites 20–50 kb away from the selected site, and a faraway region consisting of all sites further than 50 kb away from the selected site. For the neutral model, the mean

and median of the posterior distribution of the mutation rate is  $1.97\text{e-}08$  and  $1.98\text{e-}08$ . For the selection on a *de novo* mutation model, the mean and median of the posterior distribution of the mutation rate is  $2.059\text{e-}08$  and  $2.055\text{e-}08$ . For a model of the selection on standing variation, the mean and median of the posterior distribution of the mutation rate is  $2.09\text{e-}08$  and  $2.07\text{e-}08$ . These estimates are very similar to phylogenetic estimates of  $2.0\text{e-}08$  (S8).

### **Distribution of human-chimp differences in 32.7kb regions**

We computed the number of human-chimp differences in contiguous 32.7kb non-overlapping regions across the entire human genome. As the human-chimp alignment will have gaps, the 32.7kb sequence may have start and stop coordinates that exceed a length of 32.7kb. Therefore, to minimize selecting regions with poor alignment, we imposed a condition to keep only those windows whose total length was less than 33.2kb (i.e less than 500 base pairs of gaps). Note, however, that even then the number of fixed differences is assessed over exactly 32700 bases. The mean and median of this distribution are 417.4 and 410 respectively. The observed number of human-chimp differences within the 32.7kb region of *EPAS1* is 417, which lies right in the center of the genome-wide distribution. Assuming a human-chimp divergence time of 6.5 million years, and a generation time of 20 years, the mutation rate estimate for the *EPAS1* 32.7kb region is  $1.96\text{x}10\text{-}8$  per base pair per generation, again very close to the phylogenetic estimates (S8).

### Extended Data Figure 5b

The observed haplotype structure observed in Figure 3 is compatible with the introgression hypothesis. As expected under the introgression hypothesis, the Tibetan haplotype is more distant to the non-Tibetan haplotypes than the Denisovan haplotype because, after the admixture event, the introgressed haplotype accumulated extra mutations. In contrast, the Denisovan haplotype, being the product of DNA extracted from an ancient specimen, did not have time to accumulate a similar number of mutations. For example, the divergence between the introgressed haplotype (the Tibetan (Tib) haplotype) and the Yoruban haplotype would be larger than between the observed Denisovan haplotype and the Yoruban (YRI) haplotype (see Extended Data Fig. 5b):

$$T^{Tib-YRI} = a + k + b + f + e$$

$$T^{Denisovan-YRI} = a + i + b + f$$

Here the letters ( $a$ ,  $b$ ,  $e$ ,  $f$ ,  $i$ ,  $k$ ) represent branch lengths (see Extended Data Fig. 5b).  $T^{Tib-YRI}$  is larger than  $T^{Denisovan-YRI}$  because  $i < (k + e)$ . We note that different regions in the genome have different genealogies but for an introgressed region we would expect a genealogy such as the one in this figure.

### Haplotype networks constructed using other criteria, Extended Data Figure 6a and 6b

Figure 3 plots the network of the 40 most common haplotypes. Alternatively, we also used the 20 sites such that the frequency difference between Tibetans and each of the 14 populations from the 1000 Genomes project (S9) is at least 0.65 to

construct a haplotype network (Extended Data Fig. 6a). The resulting region spanned by these SNPs is the same 32.7kb region as previously identified by considering sites that are the most differentiated between Tibetans and Han (Table S3). Extended Data Fig. 4 plots the allele frequencies in all of the populations in the 20 sites within this region. We limited ourselves to these SNPs to reduce the number of haplotypes to display in a single figure, while keeping the SNPs that are most informative regarding the relationship between the selected haplotype and other haplotypes. Including all SNPs would produce an un-manageable number of haplotypes that could not be meaningfully displayed in a single figure. We inspected all the haplotypes defined by these 20 SNPs in all populations. Of the possible 2264 haplotypes ( $2 \times (\text{number of individuals in the 1000 Genomes Project}) + 80$  Tibetan chromosomes), we identified 43 unique haplotypes. We used the R (S10) software package “*pegas*” (S11) to build a tree that connects haplotypes based on pairwise differences (see Extended Data Fig. 6a). The Denisovan individual is homozygous at all the 20 sites. Extended Data Fig. 6b plots the number of pairwise differences between each of the 42 haplotypes and the Denisovan haplotype. Note, Figures 6a-b do not include the Iberians (IBS) for clarity (to reduce the number of colors needed for the plot). We decided to exclude this population because only a small number (18) of Iberians was sequenced, and the haplotypes of these individuals are identical to other European haplotypes.

## Number of pairwise differences

We computed the number of pairwise differences between a modern human haplotype and the two Denisovan haplotypes as follows:

$$H_k D = \sum_i^{\text{allsites}} \frac{\Delta_{H_k D}(i)}{2}, \text{ where } \Delta_{H_k D}(i) = 0 \text{ if Denisovan (D) is homozygous for the}$$

modern human allele at site  $i$ ,  $\Delta_{H_k D}(i) = 1$  if  $D$  is heterozygote, and  $\Delta_{H_k D}(i) = 2$  if  $D$  is homozygotes for another allele. We divided by 2 because the Denisovan is not phased, and we weight accordingly.

## D statistics under models of no gene flow

As another approach to assess the probability of an ancestral lineage having given rise to the 32.7kb haplotype we observe in Tibetans in the absence of gene flow, we compared D-statistics between human populations under simulations of several demographic models. We used all the 4 models of Sankararaman *et al.* 2012 (S12) that do not include gene flow but do contain combinations of ancestral structure and an out-of-Africa bottleneck : a model with ancestral structure and a bottleneck (asm\_b), a model with ancestral structure and no bottleneck (asm\_nb), a model with no ancestral structure and with a bottleneck (ngf\_b), and a model with no ancestral structure and no bottleneck (ngf\_nb). Our model included the Denisovans (DEN) along with four human populations: Tibetans (TIB), Han-Chinese (CHB), Europeans (CEU) and Yorubans (YRI). For Denisovans, we sampled a single diploid sample; for all other populations we sampled 80 chromosomes. Because there is no single accepted demographic history between Tibetans and Han, we assumed split times of 3kya, 5kya and 10kya. For the split times of the other populations, we used the Sankararaman *et*

*al.* 2012 (S12) estimates, which are 21kya for the split between Han/Tibet and Europeans and 350kya for the split between Humans and Denisovans. In the no-gene flow model, we assumed that Africans split from non-Africans 62.5kya ago, and for the ancestral structure model, we assumed the structure lasted until 225kya. We assumed an effective population size of 10,000 individuals and a generation time of 25 years, and we used the hapmap recombination map to estimate the local recombination rate in the *EPAS1* gene. All simulations were done in *ms* (Hudson 2002 (S13)), and the particular commands used were (for a 3kya split time for Han/Tibetans, but we also used a Han/Tibetan divergence time of 5kya and 10kya):

```
#no gene flow with bottleneck
./ms 322 100000 -t 32.7 -r 30.8 32700 -I 5 80 80 80 80 2 0 -ej
0.003000 1 2 -ej 0.021000 2 3 -en 0.025000 3 .01 -en 0.025500 3 1
-ej 0.062500 3 4 -ej 0.350000 4 5
```

```
#no gene flow without bottleneck
./ms 322 100000 -t 32.7 -r 30.8 32700 -I 5 80 80 80 80 2 0 -ej
0.003000 1 2 -ej 0.021000 2 3 -ej 0.062500 3 4 -ej 0.350000 4 5
```

```
#ancestral structure with bottleneck
./ms 322 100000 -t 32.7 -r 30.8 32700 -I 5 80 80 80 80 2 0 -m 1 2
10.000000 -m 2 3 10.000000 -m 3 4 10.000000 -m 2 4 10.000000 -m 2
1 10.000000 -m 3 2 10.000000 -m 4 3 10.000000 -m 4 2 10.000000 -
ej 0.003000 1 2 -ej 0.021000 2 3 -en 0.025000 3 .01 -en 0.025500
3 1 -ej 0.225000 3 5 -em 0.225000 4 5 5 -em 0.225000 5 4 2 -ej
0.350000 4 5
```

```
#ancestral structure without bottleneck
./ms 322 100000 -t 32.7 -r 30.8 32700 -I 5 80 80 80 80 2 0 -m 1 2
10.000000 -m 2 3 10.000000 -m 3 4 10.000000 -m 2 4 10.000000 -m 2
1 10.000000 -m 3 2 10.000000 -m 4 3 10.000000 -m 4 2 10.000000 -
ej 0.003000 1 2 -ej 0.021000 2 3 -ej 0.225000 3 5 -em 0.225000 4
5 5 -em 0.225000 5 4 2 -ej 0.350000 4 5
```

We compared these simulations with human data from the 1,000 Genomes

project (S9), where we used 80 sample chromosomes per population to avoid any bias due to sample sizes. D-statistics were calculated according to eq. 2 in Durand *et al.* 2011 (S14). The two modern human populations used in computing D-statistics are Tibetans and either CHB, CEU or YRI. The results from the findings are displayed in Extended Data Fig. 9 which assumes a Tibetan-Han divergence time of 3000 years, but the results are also significant ( $p$ -value < 0.001) if we assume a larger divergence time of 5000years or 10000years. Within the 32.7kb region, we find 48 SNPs that are derived in Denisovans. From this data, we estimate that  $D(\text{TIB, CHB, DEN, Chimp}) = -0.9584960$ ,  $D(\text{TIB, CEU, DEN, Chimp}) = -0.8990739$ , and  $D(\text{TIB, YRI, DEN, Chimp}) = -0.8818433$ . Thus, D is very low regardless of whether we use CHB, CEU or YRI. Comparing the D values to the simulations under the null model, we find that the observed D statistics are in the extreme tail, with  $p < 0.001$  for all comparisons (see Tables S8 to S10). In fact, for the ancestral structure model, none of the simulations were able to produce D values as low as what we observed. We also find that the distribution of D becomes wider with increasing split time or when we include a bottleneck, and as a consequence, we find the highest  $p$ -values when we calculate  $D(\text{TIB, YRI, DEN, Chimp})$ . Thus, these simulations suggest that it is very unlikely that D values that low are due to incomplete lineage sorting in the ancestral population, consistent with our claim of introgression.

### Supplementary References

S1. Yi, X. *et al.*, Sequencing of 50 human exomes reveals adaptation to high altitude. *Science*. **329**,75-78 (2010).

- S2. Gutenkunst, R.N. *et al.* Inferring the joint demographic history of multiple populations from multidimensional SNP data. *PLoS Genetics* 5:e1000695 (2009)
- S3. Peter B. *et al.* Distinguishing between Selective Sweeps from Standing Variation and from a *De Novo* Mutation. *PLoS Genetics* 8(10): e1003011 (2012).
- S4. Voight BF, Kudaravalli S, Wen X, Pritchard JK (2006) A map of recent positive selection in the human genome. *PLoS Biol* 4: e72 doi:10.1371/journal.pbio.0040072.
- S5. Sabeti PC, Reich DE, Higgins JM, Levine HZP, Richter DJ, *et al.* (2002) Detecting recent positive selection in the human genome from haplotype structure. *Nature* 419: 832–837. doi: 10.1038/nature01140v
- S6. Tajima F (1989) Statistical Method for Testing the Neutral Mutation Hypothesis by DNA Polymorphism. *Genetics* 123: 585–595.
- S7. Fay JC, Wu C-I (2000) Hitchhiking Under Positive Darwinian Selection. *Genetics* 155: 1405–1413.
- S8. Scally A. and Durbin R. Revising the human mutation rate: implications for understanding human evolution. *Nat Rev Genet.* 13, 745-53 (2012).
- S9. McVean, G. *et al.* An integrated map of genetic variation from 1,092 human genomes. *Nature* 491, 56–65 (2012).
- S10. R (<http://r-cran.org>)
- S11. Paradis. E. Pegas: an R package for population genetics with an integrated–modular approach. *Bioinformatics.* 26, 419-420 (2010).
- S12. Sankararaman, S. *et al.*, 2012. The Date of Interbreeding between Neandertals and Modern Humans. *PLoS Genet*, 8(10), p.e1002947.
- S13. Hudson, R.R. Generating samples under a Wright-Fisher neutral model of genetic variation. *Bioinformatics (Oxford, England)*, 18, 337–338 (2002).
- S14. Durand, E.Y. *et al.* Testing for ancient admixture between closely related populations. *Molecular Biology and Evolution* 28, 2239–2252 (2011).
- S15. Meyer, M. *et al.* A high-coverage genome sequence from an archaic Denisovan individual. *Science* 388, 222-226 (2012).
- S16. Prufer K. *et al.*, The complete genome sequence of a Neanderthal from the Altai Mountains. *Nature* 505, 43-49 (2014).



## Supplementary Tables

Table S1 The first 238 SNPs in *EPAS1* (out of 477)

|          |          |          |          |          |          |          |
|----------|----------|----------|----------|----------|----------|----------|
| 46358021 | 46366087 | 46374208 | 46387234 | 46397320 | 46404972 | 46411824 |
| 46358466 | 46366545 | 46374220 | 46387724 | 46397399 | 46405027 | 46411936 |
| 46358835 | 46366806 | 46375111 | 46387842 | 46398115 | 46405339 | 46412034 |
| 46358881 | 46367079 | 46377419 | 46388002 | 46398158 | 46405551 | 46412045 |
| 46359412 | 46367187 | 46377519 | 46388691 | 46398742 | 46405681 | 46412777 |
| 46359580 | 46367600 | 46377754 | 46388789 | 46399043 | 46405848 | 46412975 |
| 46359642 | 46367949 | 46378084 | 46389040 | 46399106 | 46405962 | 46412981 |
| 46360148 | 46368021 | 46378895 | 46389060 | 46399122 | 46406105 | 46413280 |
| 46360207 | 46368077 | 46381044 | 46389112 | 46399227 | 46406430 | 46413588 |
| 46361168 | 46368411 | 46381320 | 46389383 | 46399820 | 46406635 | 46413618 |
| 46361928 | 46368427 | 46381791 | 46389445 | 46400062 | 46407353 | 46414442 |
| 46362045 | 46368782 | 46382173 | 46389679 | 46400494 | 46408037 | 46414693 |
| 46362345 | 46369143 | 46382195 | 46389699 | 46400575 | 46408150 | 46414706 |
| 46362500 | 46369325 | 46382305 | 46390356 | 46400630 | 46408551 | 46414813 |
| 46362729 | 46369670 | 46382465 | 46390540 | 46400998 | 46408725 | 46415114 |
| 46362869 | 46369864 | 46382792 | 46390560 | 46401144 | 46408767 | 46415289 |
| 46363161 | 46370096 | 46382793 | 46391093 | 46401384 | 46408848 | 46415320 |
| 46363224 | 46370323 | 46382942 | 46391108 | 46401587 | 46409011 | 46416260 |
| 46363225 | 46371633 | 46383343 | 46391312 | 46401613 | 46409174 | 46416579 |
| 46363398 | 46371939 | 46383410 | 46391314 | 46401854 | 46409849 | 46416783 |
| 46363650 | 46372006 | 46383582 | 46391844 | 46402399 | 46409904 | 46416800 |
| 46363785 | 46372009 | 46384165 | 46392298 | 46402410 | 46409966 | 46416896 |
| 46363837 | 46372042 | 46384435 | 46392352 | 46402544 | 46410137 | 46416963 |
| 46364243 | 46372398 | 46384562 | 46393696 | 46402559 | 46410265 | 46417642 |
| 46364282 | 46372566 | 46384907 | 46394382 | 46402893 | 46410431 | 46418258 |
| 46364296 | 46372897 | 46385230 | 46394649 | 46403037 | 46411073 | 46418501 |
| 46364908 | 46372929 | 46385306 | 46394807 | 46403636 | 46411104 | 46418595 |
| 46364955 | 46373095 | 46385310 | 46395343 | 46403771 | 46411148 | 46419026 |
| 46365183 | 46373244 | 46385677 | 46395811 | 46403832 | 46411252 | 46419364 |
| 46365275 | 46373557 | 46386112 | 46395912 | 46403996 | 46411461 | 46420168 |
| 46365353 | 46373879 | 46386859 | 46395953 | 46404222 | 46411466 | 46420523 |

**Table S2** The rest of the SNPs in *EPAS1* (239 out of 477)

|          |          |          |          |          |          |          |
|----------|----------|----------|----------|----------|----------|----------|
| 46421653 | 46430803 | 46437257 | 46446028 | 46454321 | 46460714 | 46470622 |
| 46422184 | 46431148 | 46437557 | 46446311 | 46454398 | 46461837 | 46470686 |
| 46422310 | 46431261 | 46437563 | 46446577 | 46454616 | 46462046 | 46470811 |
| 46422521 | 46431312 | 46437875 | 46446803 | 46454696 | 46462168 | 46471311 |
| 46423274 | 46431903 | 46438077 | 46446970 | 46454766 | 46462549 | 46471869 |
| 46423562 | 46432417 | 46438230 | 46447040 | 46454918 | 46463076 | 46472086 |
| 46423846 | 46432428 | 46438356 | 46447429 | 46455000 | 46463399 | 46472285 |
| 46424212 | 46432777 | 46438363 | 46447626 | 46455359 | 46463461 | 46472426 |
| 46424521 | 46432852 | 46439387 | 46447779 | 46455371 | 46463470 | 46472464 |
| 46424629 | 46432913 | 46439392 | 46448104 | 46455755 | 46463475 | 46472505 |
| 46424814 | 46433162 | 46440538 | 46448606 | 46455923 | 46463620 | 46472959 |
| 46424939 | 46433179 | 46440601 | 46448760 | 46456124 | 46463679 | 46473935 |
| 46425145 | 46433193 | 46441523 | 46448832 | 46456182 | 46463716 | 46474490 |
| 46425953 | 46433234 | 46441835 | 46448867 | 46456226 | 46463983 | 46474591 |
| 46425987 | 46433385 | 46441992 | 46449937 | 46456669 | 46464109 | 46475380 |
| 46426708 | 46433495 | 46442452 | 46450292 | 46456706 | 46464184 | 46475749 |
| 46426714 | 46433570 | 46442536 | 46450455 | 46456764 | 46464286 | 46475834 |
| 46426803 | 46433948 | 46442608 | 46450800 | 46456942 | 46464491 | 46475977 |
| 46426899 | 46433978 | 46442683 | 46451085 | 46457175 | 46464975 | 46476366 |
| 46427468 | 46434578 | 46442715 | 46451260 | 46457547 | 46467027 | 46476377 |
| 46427484 | 46434957 | 46442799 | 46451331 | 46458016 | 46467706 | 46477018 |
| 46428425 | 46435048 | 46442827 | 46451374 | 46458052 | 46467739 | 46477115 |
| 46428827 | 46435147 | 46442991 | 46451529 | 46458087 | 46467802 | 46477781 |
| 46428892 | 46435236 | 46443838 | 46451737 | 46458097 | 46467939 | 46478082 |
| 46429676 | 46435241 | 46443888 | 46451807 | 46458185 | 46467967 | 46478097 |
| 46429746 | 46435886 | 46443960 | 46452072 | 46458210 | 46469451 | 46478103 |
| 46429769 | 46436395 | 46444229 | 46452534 | 46458310 | 46469459 | 46478227 |
| 46429992 | 46436567 | 46444328 | 46452778 | 46458361 | 46469569 | 46478448 |
| 46430077 | 46436666 | 46444364 | 46452877 | 46459163 | 46469718 | 46479112 |
| 46430398 | 46436691 | 46444376 | 46452964 | 46459439 | 46469820 | 46483002 |
| 46430666 | 46436725 | 46444948 | 46453534 | 46459458 | 46469980 | 46484000 |
| 46430716 | 46436739 | 46445066 | 46453862 | 46459986 | 46470186 | 46484327 |
| 46430755 | 46437085 | 46445268 | 46454163 | 46460001 | 46470444 | 46484933 |
| 46430769 | 46437097 | 46445510 | 46454165 | 46460292 | 46470494 | 46486982 |
|          |          |          |          |          |          | 46487171 |

**Table S3** SNPs in *EPAS1* with the largest frequency differences between Tibetans and Han individuals.

| SNP LABEL | Position (hg18) | Position (hg19) | Tibetan derived freq (out of 80) | Han derived freq (out of 80) |
|-----------|-----------------|-----------------|----------------------------------|------------------------------|
| 1         | 46421420        | 46567916        | 67                               | 0                            |
| 2         | 46422184        | 46568680        | 66                               | 0                            |
| 3         | 46422521        | 46569017        | 66                               | 0                            |
| 4         | 46423274        | 46569770        | 66                               | 0                            |
| 5         | 46423846        | 46570342        | 67                               | 0                            |
| 6         | 46424521        | 46571017        | 66                               | 0                            |
| 7         | 46424939        | 46571435        | 67                               | 0                            |
| 8         | 46428892        | 46575388        | 70                               | 10                           |
| 9         | 46430716        | 46577212        | 10                               | 72                           |
| 10        | 46430755        | 46577251        | 69                               | 1                            |
| 11        | 46430769        | 46577265        | 10                               | 73                           |
| 12        | 46430803        | 46577299        | 70                               | 8                            |
| 13        | 46432777        | 46579273        | 71                               | 11                           |
| 14        | 46432913        | 46579409        | 10                               | 75                           |
| 15        | 46433193        | 46579689        | 16                               | 79                           |
| 16        | 46433978        | 46580474        | 12                               | 75                           |
| 17        | 46435147        | 46581643        | 69                               | 7                            |
| 18        | 46435236        | 46581732        | 69                               | 7                            |
| 19        | 46437085        | 46583581        | 67                               | 1                            |
| 20        | 46438363        | 46584859        | 67                               | 1                            |
| 21        | 46441523        | 46588019        | 67                               | 1                            |
| 22        | 46441835        | 46588331        | 67                               | 1                            |
| 23        | 46442536        | 46589032        | 66                               | 1                            |
| 24        | 46442827        | 46589323        | 14                               | 79                           |
| 25        | 46446311        | 46592807        | 64                               | 1                            |
| 26        | 46447040        | 46593536        | 16                               | 76                           |
| 27        | 46447626        | 46594122        | 64                               | 1                            |
| 28        | 46451260        | 46597756        | 65                               | 1                            |
| 29        | 46451529        | 46598025        | 65                               | 1                            |
| 30        | 46453534        | 46600030        | 65                               | 1                            |
| 31        | 46453862        | 46600358        | 65                               | 1                            |
| 32        | 46454165        | 46600661        | 65                               | 1                            |

**Table S4** Haplotypes at the five SNPs of interest in *EPAS1* in Tibetans (Extended Data Figure 3), in the genomes from Meyer *et al.* 2012 (S15) and from the published high coverage Altai Neanderthal genome (S16). Note we present the most common haplotype in Tibetans only. The data from Meyer *et al.* (2012) is not phased but since most individuals are homozygous, we can infer the haplotypes corresponding to these SNPs.

| Position (hg19)   | 46567916 | 46568680 | 46569017 | 46569770 | 46570342 |
|-------------------|----------|----------|----------|----------|----------|
| Tibetan           | A        | G        | G        | A        | A        |
| Denisovan         | A        | G        | G        | A        | A        |
| Altai Neanderthal | G        | G        | G        | A        | G        |
| Dinka             | G        | A        | A        | G        | G        |
| French            | G        | A        | A        | G        | G        |
| Papuan            | G        | A        | A        | G        | G        |
| Sardinian         | G        | A        | A        | G        | G        |
| Han               | G        | A        | A        | G        | G        |
| Yoruba            | G        | A        | A        | G        | G        |
| Karitiana         | G        | A        | A        | G        | G        |
| San               | G        | A        | A        | G        | G        |
| Mandeka           | G        | A        | A        | G        | G        |
| Dai               | G        | A        | A        | G        | G        |
| Mbuti             | A        | A        | A        | G        | G        |
| CEU               | G        | A        | A        | G        | G        |
| YRI               | G        | A        | A        | G        | G        |
| YRI               | A        | A        | A        | G        | G        |
| Vindija           | G        | A        | M        | G        | G        |
| Vindija           | A        | G        | M        | A        | G        |

**Table S5.** Frequency of 43 haplotypes defined by the 20 most differentiated sites between Tibetan and the 1000 Genomes project populations. Table S6 contains the frequencies of these haplotypes. The first haplotype (AGGAAGCCGGGCGTGCGAAC) is the Denisovan haplotype.

| Haplotype                | Haplotype                |
|--------------------------|--------------------------|
| 1. AGGAAGCCGGGCGTGCGAAC  | 23. GAAGGCGTAGACGTAACAAA |
| 2. GAAGGCGCAGAGGTGCGGAA  | 24. AGGGAGCCGAGGCTGCGGGC |
| 3. AGGAAGCCGAGGCTAACAAA  | 25. GAAGGCGTAGACGTAACAAC |
| 4. GAAGGCGCAGGCTGCGGGC   | 26. GGGGCGTAGACGCAACAAA  |
| 5. AAAGGCGTAGACGCAACAAA  | 27. GAAGGCGTAGACGCACCAAA |
| 6. AAAGGCGTAGACGCAACAAC  | 28. AGGAGCGTAGACGCAACAAA |
| 7. AGGAAGCCAGACGCAACAAA  | 29. GGGGCGTAGACGCAACAAC  |
| 8. GAAGGCGTAGACGCAACGAA  | 30. AGGAAGCCAGGGCTGCGGGC |
| 9. AGGAAGCCGAGGCTGCGGGC  | 31. AAAGGCGTAGACGCAACGAA |
| 10. GAAGGCGTAGACGCAACAAC | 32. AGGGGCGTAGACGTAACAAA |
| 11. AAAAACCCAAGGCTGCGGGC | 33. AGGAAGCTAGACGCAACAAA |
| 12. GAAGGCGCAGGCCAACAAA  | 34. AGGAGCGTAGACGTAACAAA |
| 13. GAAGGCGTAGACGCGACAAA | 35. AGGAGCGTAGACGTAACAAC |
| 14. GAAAGCGTAGACGTAACGAC | 36. AGGAACGCAGACGTGCGGAC |
| 15. GAAAGGGTAGACGCAACAAA | 37. GAAGGCGTAGACGTGCGGAC |
| 16. GAAGGCGTAGACGCAACAAA | 38. GGGAACGTAGACGCAACAAA |
| 17. AAAGGCGTAGACGTAACAAA | 39. GAAGGCGTAAAGCCAACAAA |
| 18. GAAGGGGTAGACGCAACAAC | 40. GGGAACGTAGACGCAACAAC |
| 19. GAAGGGGTAGACGCAACAAA | 41. AGGAAGCCAAGGCTGCGGGC |
| 20. AGGAAGGTAGACGCAACAAA | 42. AGGAAGCCGAACGCACGGGC |
| 21. GAAAGCGTAGACGTAACAAC | 43. AGGGGCGTAGACGCAACAAA |
| 22. GAAAGCGTAGACGTAACAAA |                          |

**Table S6** The frequency of each haplotype (from Table S5) by population. TIB and DEN are abbreviations for Tibetan and Denisovan. The other abbreviations correspond to the populations from the 1000 Genomes project.

|    | GBR | FIN | CHS | PUR | CLM | CEU | YRI | CHB | JPT | LWK | ASW | MXL | TSI | TIB | DEN |
|----|-----|-----|-----|-----|-----|-----|-----|-----|-----|-----|-----|-----|-----|-----|-----|
| 1  | 0   | 0   | 0   | 0   | 0   | 0   | 0   | 0   | 0   | 0   | 0   | 0   | 0   | 0   | 2   |
| 2  | 0   | 0   | 1   | 0   | 0   | 0   | 0   | 0   | 0   | 0   | 0   | 0   | 0   | 0   | 0   |
| 3  | 0   | 0   | 0   | 0   | 0   | 0   | 0   | 0   | 0   | 0   | 0   | 0   | 0   | 2   | 0   |
| 4  | 0   | 0   | 0   | 0   | 0   | 0   | 0   | 0   | 0   | 0   | 0   | 0   | 0   | 2   | 0   |
| 5  | 1   | 0   | 0   | 3   | 0   | 0   | 6   | 0   | 0   | 3   | 5   | 0   | 0   | 0   | 0   |
| 6  | 0   | 0   | 0   | 1   | 0   | 0   | 11  | 0   | 0   | 10  | 3   | 0   | 0   | 0   | 0   |
| 7  | 0   | 0   | 0   | 0   | 0   | 0   | 0   | 0   | 0   | 0   | 0   | 0   | 0   | 1   | 0   |
| 8  | 0   | 0   | 0   | 0   | 0   | 0   | 4   | 0   | 0   | 0   | 2   | 0   | 0   | 0   | 0   |
| 9  | 0   | 0   | 0   | 0   | 0   | 0   | 0   | 0   | 0   | 0   | 0   | 0   | 0   | 57  | 0   |
| 10 | 0   | 0   | 0   | 1   | 0   | 0   | 3   | 0   | 0   | 9   | 1   | 0   | 0   | 0   | 0   |
| 11 | 0   | 0   | 0   | 0   | 0   | 0   | 0   | 0   | 0   | 0   | 0   | 0   | 0   | 1   | 0   |
| 12 | 0   | 0   | 0   | 0   | 0   | 0   | 0   | 0   | 0   | 0   | 0   | 0   | 0   | 1   | 0   |
| 13 | 0   | 0   | 0   | 0   | 0   | 0   | 0   | 0   | 0   | 2   | 0   | 0   | 0   | 0   | 0   |
| 14 | 0   | 0   | 0   | 0   | 0   | 0   | 1   | 0   | 0   | 0   | 0   | 0   | 0   | 0   | 0   |
| 15 | 0   | 0   | 0   | 0   | 0   | 0   | 0   | 0   | 0   | 4   | 1   | 0   | 0   | 0   | 0   |
| 16 | 167 | 180 | 196 | 100 | 108 | 158 | 102 | 190 | 178 | 133 | 84  | 126 | 180 | 10  | 0   |
| 17 | 3   | 0   | 0   | 1   | 1   | 2   | 0   | 0   | 0   | 0   | 2   | 0   | 3   | 0   | 0   |
| 18 | 0   | 0   | 0   | 0   | 0   | 0   | 0   | 0   | 0   | 1   | 0   | 0   | 0   | 0   | 0   |
| 19 | 0   | 0   | 0   | 0   | 0   | 0   | 0   | 0   | 0   | 2   | 0   | 0   | 0   | 0   | 0   |
| 20 | 0   | 0   | 1   | 0   | 0   | 0   | 0   | 0   | 0   | 0   | 0   | 0   | 0   | 0   | 0   |
| 21 | 0   | 0   | 0   | 0   | 0   | 0   | 2   | 0   | 0   | 1   | 0   | 0   | 0   | 0   | 0   |
| 22 | 0   | 0   | 0   | 0   | 0   | 0   | 0   | 0   | 0   | 1   | 0   | 0   | 0   | 0   | 0   |
| 23 | 2   | 1   | 2   | 2   | 0   | 3   | 22  | 0   | 0   | 9   | 11  | 0   | 3   | 0   | 0   |
| 24 | 0   | 0   | 0   | 0   | 0   | 0   | 0   | 0   | 0   | 0   | 0   | 0   | 0   | 1   | 0   |
| 25 | 0   | 0   | 0   | 0   | 0   | 0   | 1   | 0   | 0   | 0   | 1   | 0   | 0   | 0   | 0   |
| 26 | 0   | 0   | 0   | 0   | 0   | 0   | 1   | 0   | 0   | 0   | 0   | 0   | 0   | 0   | 0   |
| 27 | 5   | 5   | 0   | 2   | 10  | 7   | 0   | 0   | 0   | 0   | 3   | 6   | 9   | 0   | 0   |
| 28 | 0   | 0   | 0   | 0   | 0   | 0   | 0   | 0   | 0   | 2   | 0   | 0   | 0   | 0   | 0   |
| 29 | 0   | 0   | 0   | 0   | 0   | 0   | 0   | 0   | 0   | 0   | 1   | 0   | 0   | 0   | 0   |
| 30 | 0   | 0   | 0   | 0   | 0   | 0   | 0   | 0   | 0   | 0   | 0   | 0   | 0   | 1   | 0   |
| 31 | 0   | 0   | 0   | 0   | 0   | 0   | 12  | 0   | 0   | 7   | 4   | 0   | 0   | 0   | 0   |
| 32 | 0   | 0   | 0   | 0   | 0   | 0   | 0   | 0   | 0   | 5   | 0   | 0   | 0   | 0   | 0   |
| 33 | 0   | 0   | 0   | 0   | 0   | 0   | 0   | 0   | 0   | 0   | 0   | 0   | 0   | 1   | 0   |
| 34 | 0   | 0   | 0   | 0   | 0   | 0   | 4   | 0   | 0   | 2   | 2   | 0   | 0   | 0   | 0   |
| 35 | 0   | 0   | 0   | 0   | 0   | 0   | 0   | 0   | 0   | 0   | 2   | 0   | 0   | 0   | 0   |
| 36 | 0   | 0   | 0   | 0   | 0   | 0   | 0   | 1   | 0   | 0   | 0   | 0   | 0   | 0   | 0   |

|    | GBR | FIN | CHS | PUR | CLM | CEU | YRI | CHB | JPT | LWK | ASW | MXL | TSI | TIB | DEN |
|----|-----|-----|-----|-----|-----|-----|-----|-----|-----|-----|-----|-----|-----|-----|-----|
| 37 | 0   | 0   | 0   | 0   | 0   | 0   | 0   | 1   | 0   | 0   | 0   | 0   | 0   | 0   | 0   |
| 38 | 0   | 0   | 0   | 0   | 1   | 0   | 7   | 0   | 0   | 0   | 0   | 0   | 1   | 0   | 0   |
| 39 | 0   | 0   | 0   | 0   | 0   | 0   | 0   | 2   | 0   | 0   | 0   | 0   | 0   | 0   | 0   |
| 40 | 0   | 0   | 0   | 0   | 0   | 0   | 0   | 0   | 0   | 2   | 0   | 0   | 0   | 0   | 0   |
| 41 | 0   | 0   | 0   | 0   | 0   | 0   | 0   | 0   | 0   | 0   | 0   | 0   | 0   | 2   | 0   |
| 42 | 0   | 0   | 0   | 0   | 0   | 0   | 0   | 0   | 0   | 0   | 0   | 0   | 0   | 1   | 0   |
| 43 | 0   | 0   | 0   | 0   | 0   | 0   | 0   | 0   | 0   | 1   | 0   | 0   | 0   | 0   | 0   |

**Table S7.** Column 2 corresponds to the positions of the 32 SNPs that show the largest frequency difference between the Han and the Tibetans (see Table S3). The third and fourth columns are the high coverage Altai Neanderthal (S16) alleles at those sites. The fifth and the sixth columns are the Denisovan alleles. The seventh column is the list of alleles corresponding to the most common Tibetan haplotype at these SNPs. The last column is the frequency of the derived alleles at these sites in Tibetans (out of 80 chromosomes). The yellow highlighting represents sites that are not SNPs in the 1000 Genomes project. The blue highlighting represents the 20 sites that are only highly differentiated between Tibetans and all populations from the 1000 Genomes project. The green highlighting represents sites where the Tibetans are different from the Denisovan.

| SNP LABEL | hg19     | Nea | Nea | Denisovan | Denisovan | Tibetan most common haplotype | Tibetan derived frequency |
|-----------|----------|-----|-----|-----------|-----------|-------------------------------|---------------------------|
| 1         | 46567916 | G   | G   | A         | A         | A                             | 67                        |
| 2         | 46568680 | G   | G   | G         | G         | G                             | 66                        |
| 3         | 46569017 | G   | G   | G         | G         | G                             | 66                        |
| 4         | 46569770 | A   | A   | A         | A         | A                             | 66                        |
| 5         | 46570342 | G   | G   | A         | A         | A                             | 67                        |
| 6         | 46571017 | C   | C   | G         | G         | G                             | 66                        |
| 7         | 46571435 | G   | G   | C         | C         | C                             | 67                        |
| 8         | 46575388 | A   | A   | G         | G         | G                             | 70                        |
| 9         | 46577212 | C   | C   | T         | T         | T                             | 10                        |
| 10        | 46577251 | T   | T   | C         | C         | C                             | 69                        |
| 11        | 46577265 | C   | C   | A         | A         | A                             | 10                        |
| 12        | 46577299 | A   | A   | G         | G         | G                             | 70                        |
| 13        | 46579273 | A/G | A/G | G         | G         | G                             | 71                        |
| 14        | 46579409 | G   | G   | A         | A         | A                             | 10                        |
| 15        | 46579689 | A   | A   | G         | G         | G                             | 16                        |
| 16        | 46580474 | T   | T   | T         | T         | T                             | 12                        |
| 17        | 46581643 | C   | C   | C         | C         | C                             | 69                        |
| 18        | 46581732 | C   | C   | C         | C         | C                             | 69                        |
| 19        | 46583581 | G   | G   | G         | G         | A                             | 67                        |
| 20        | 46584859 | A   | A   | G         | G         | G                             | 67                        |
| 21        | 46588019 | C   | C   | C         | C         | G                             | 67                        |
| 22        | 46588331 | G   | G   | G         | G         | C                             | 67                        |
| 23        | 46589032 | C   | C   | T         | T         | T                             | 66                        |
| 24        | 46589323 | C   | C   | A         | A         | A                             | 14                        |
| 25        | 46592807 | C   | C   | T         | T         | T                             | 64                        |
| 26        | 46593536 | A   | A   | A         | A         | A                             | 16                        |
| 27        | 46594122 | A   | A   | G         | G         | G                             | 64                        |
| 28        | 46597756 | C   | C   | C         | C         | C                             | 65                        |
| 29        | 46598025 | C   | C   | G         | G         | G                             | 65                        |
| 30        | 46600030 | A   | A   | A         | A         | G                             | 65                        |
| 31        | 46600358 | A   | A   | A         | A         | G                             | 65                        |
| 32        | 46600661 | A   | A   | C         | C         | C                             | 65                        |



**Table S8:** P-values for D under the four models simulated assuming a Tibetan-Han (TIB-CHB) split of 3,000 years ago. Each entry gives the proportion of simulations with a D value lower than the one observed out of 100,000 simulations.

| 3,000y divergence | TIB-CHB | TIB-CEU | TIB-YRI |
|-------------------|---------|---------|---------|
| Ngf_b             | 0.00016 | 0.00024 | 0.00088 |
| Ngf_nb            | 0.00009 | 0.00014 | 0.00045 |
| Asm_b             | <1e-5   | <1e-5   | <1e-5   |
| Asm_nb            | <1e-5   | <1e-5   | <1e-5   |

**Table S9:** P-values for D under the four models simulated assuming a Tibetan-Han (TIB-CHB) split of 5,000 years ago. Each entry gives the proportion of simulations with a D value lower than the one observed out of 100,000 simulations.

| 5,000y divergence | TIB-CHB | TIB-CEU | TIB-YRI |
|-------------------|---------|---------|---------|
| Ngf_b             | 0.00008 | 0.00019 | 0.00094 |
| Ngf_nb            | 0.00008 | 0.00008 | 0.00041 |
| Asm_b             | <1e-5   | <1e-5   | <1e-5   |
| Asm_nb            | <1e-5   | <1e-5   | <1e-5   |

**Table S10:** P-values for D under the four models simulated assuming a Tibetan-Han (TIB-CHB) split of 10,000 years ago. Each entry gives the proportion of simulations with a D value lower than the one observed out of 100,000 simulations.

| 10,000y divergence | TIB-CHB | TIB-CEU | TIB-YRI |
|--------------------|---------|---------|---------|
| Ngf_b              | 0.00021 | 0.00023 | 0.00078 |
| Ngf_nb             | 0.00007 | 0.00012 | 0.00042 |
| Asm_b              | <1e-5   | <1e-5   | <1e-5   |
| Asm_nb             | <1e-5   | <1e-5   | <1e-5   |

**Table S11.** The characterization of the 14 sites where the Denisovan differs from the most common Tibetan haplotype. In the main text we quote 12 differences because if the Denisovan is heterozygous we consider that to contribute only 0.5 (see Supplementary Information titled “Number of pairwise differences”). Five of the mutations occurred on the Denisovan lineage (light blue). Nine of the mutations occur on the modern human lineage (light orange, except position 46600226 is also derived in Denisovans). In pink we show the mutations that are unique to Tibetans and that presumably have landed on the Denisovan-introgressed haplotype after introgression.

| Positions (hg19) | Denisovan Alleles | Chimp allele | Tibetan allele | Humans (1000Genome samples and Tibetan samples)                                                       |
|------------------|-------------------|--------------|----------------|-------------------------------------------------------------------------------------------------------|
| 46578392         | A/C               | A            | A              | A                                                                                                     |
| 56579659         | A                 | T            | T              | T                                                                                                     |
| 46580956         | C/G               | C            | C              | C                                                                                                     |
| 46594186         | G/T               | G            | G              | G                                                                                                     |
| 46595734         | G/C               | G            | G              | G                                                                                                     |
| 46581074         | C                 | C            | G              | C/G; G on Tibetan haplotype                                                                           |
| 46583581         | G                 | G            | A              | G/A; only Tibetans have the derived allele A at high frequency and the Han have it at small frequency |
| 46588019         | C                 | C            | G              | C/G only Tibetans have the derived allele G at high frequency and the Han have it at small frequency  |
| 46588331         | G                 | G            | C              | G, only Tibetans have the derived allele C at high frequency and Han have it at small frequency       |
| 46596433         | A                 | A            | G              | A/G; G on Tibetan haplotype                                                                           |
| 46597870         | T                 | T            | C              | T/C; C on Tibetan haplotype                                                                           |
| 46600030         | A                 | A            | G              | A/G; G on Tibetan haplotype                                                                           |
| 46600226         | G                 | T            | T              | T/G; T on Tibetan haplotype                                                                           |
| 46600358         | A                 | A            | G              | A/G, only Tibetans have the derived allele G at high frequency. All the 1000Genome samples have A.    |
